# Supplementary material for: Corvids in Urban Environments: A Systematic Global Literature Review
Source: MDPI journal article supplement (doi:10.3390/ani11113226), 2021-11-11
Supplement: s1 [file s1]

# Corvids in urban environments: a systematic global literature review

Isma Benmazouz 1,\*, Jukka Jokimäki<sup>2</sup>, Szabolcs Lengyel<sup>3</sup>, Lajos Juhász<sup>4</sup>, Marja-Liisa Kaisanlahti-Jokimäki<sup>2</sup>, Gábor Kardos<sup>5</sup>, Petra Paládi<sup>1</sup>, and László, Kövér<sup>4</sup>

- <sup>1</sup> Animal Husbandry Doctoral School, University of Debrecen, Hungary; benmazouz.isma@agr.unideb.hu; paladi.petra@agr.unideb.hu  
<sup>2</sup> Arctic Centre, University of Lapland, Finland; jukka.jokimaki@ulapland.fi; marja-liisa.kaisanlahti@ulapland.fi  
<sup>3</sup> Department of Tisza Research, Institute of Aquatic Ecology, Centre for Ecological Research, Eötvös Loránd Research Network; lengyel.szabolcs@ecolres.hu  
<sup>4</sup> Department of Nature Conservation Zoology and Game Management, University of Debrecen, Hungary; juhaszl@agr.unideb.hu; koverl@agr.unideb.hu  
<sup>5</sup> Institute of Metagenomics, University of Debrecen, Hungary; kg@med.unideb.hu  
\* Correspondence: benmazouz.isma@agr.unideb.hu

## Supplement material

### Table S1: Prisma Check List.

Final search string applied to Web of Science and Scopus:

### Keywords used:

*"Corvids" OR "Crow" OR "jay" OR "magpie" OR "nutcracker" OR "brushcrow" OR "chough" OR "piapiac" OR "raven" OR "rook" OR "treepie" OR jackdaws" and "cities" OR "city" OR "urban" OR "suburban" OR "sub-urban" OR "town" OR "suburbs" OR "residential" OR "man-made" OR "human-made" OR "Builtup" OR "buildup" OR "built-up" OR "build-up" OR "developed" OR "non-rural" OR "metropol" AND NOT "crowd" OR "crowe" OR "crown" OR "jaya" – in topic (Title, Abstract, Key word).*

### Table S2: List of reviewed articles with the reference numbers used in the tables.

Table S2.xlsx

**Table S3.** Number of species-specific articles by species and continent (n = 424). The reference numbers in the table refers to the individual publication numbers given in the Table S2.

Table S3.docx
