# Supplementary material for: Corvids in Urban Environments: A Systematic Global Literature Review
Source: MDPI journal article supplement (doi:10.3390/ani11113226), 2021-11-11
Supplement: s1 [file s1]

| Species                                        | Continent | N  | References                                                                                                                                                                                                                                                                                                                                                                                                                                                            |
|------------------------------------------------|-----------|----|-----------------------------------------------------------------------------------------------------------------------------------------------------------------------------------------------------------------------------------------------------------------------------------------------------------------------------------------------------------------------------------------------------------------------------------------------------------------------|
| American Crow ( <i>Corvus brachyrhynchos</i> ) | America   | 47 | 40, 73, 92, 126, 154, 221, 222, 205, 91, 193, 271, 133, 134, 369, 114, 63, 74, 101, 127, 132, 150, 183, 203, 220, 235, 236, 239, 243, 244, 245, 246, 255, 268, 272, 273, 288, 351, 352, 353, 374, 381, 386, 79, 80, 81, 328, 380                                                                                                                                                                                                                                      |
| Carrion Crow ( <i>Corvus corone corone</i> )   | Asia      | 8  | 209, 248, 388, 391, 406, 413, 415, 416                                                                                                                                                                                                                                                                                                                                                                                                                                |
| Carrion Crow ( <i>Corvus corone corone</i> )   | Europe    | 26 | 18, 32, 41, 94, 117, 140, 163, 164, 177, 178, 179, 189, 209, 240, 261, 295, 299, 300, 322, 323, 329, 357, 364, 371, 390, 409                                                                                                                                                                                                                                                                                                                                          |
| Common Raven ( <i>Corvus corax</i> )           | America   | 31 | 92, 193, 271, 20, 37, 44, 57, 61, 75, 76, 77, 115, 147, 149, 168, 200, 201, 202, 211, 212, 232, 233, 297, 326, 333, 366, 372, 373, 376, 392, 422                                                                                                                                                                                                                                                                                                                      |
| Common Raven ( <i>Corvus corax</i> )           | Australia | 1  | 55                                                                                                                                                                                                                                                                                                                                                                                                                                                                    |
| Common Raven ( <i>Corvus corax</i> )           | Europe    | 15 | 2, 19, 26, 27, 61, 102, 163, 189, 216, 233, 242, 249, 250, 276, 397                                                                                                                                                                                                                                                                                                                                                                                                   |
| Eurasian Magpie ( <i>Pica pica</i> )           | Europe    | 93 | 12, 13, 14, 18, 22, 35, 38, 41, 64, 67, 68, 71, 95, 96, 99, 100, 102, 105, 110, 113, 117, 122, 125, 128, 129, 130, 131, 135, 136, 137, 138, 139, 140, 148, 157, 159, 161, 164, 169, 170, 171, 172, 176, 177, 178, 179, 180, 181, 184, 185, 186, 187, 189, 192, 197, 214, 225, 227, 234, 237, 240, 242, 249, 250, 251, 252, 270, 276, 280, 322, 325, 335, 336, 339, 340, 341, 342, 343, 344, 345, 367, 368, 382, 383, 384, 385, 393, 394, 397, 398, 408, 409, 423, 424 |
| Eurasian Magpie ( <i>Pica pica</i> )           | Asia      | 1  | 401                                                                                                                                                                                                                                                                                                                                                                                                                                                                   |
| Eurasian Jay ( <i>Garrulus glandarius</i> )    | Europe    | 18 | 41, 87, 117, 128, 131, 140, 148, 155, 177, 216, 219, 240, 242, 249, 250, 276, 335, 397                                                                                                                                                                                                                                                                                                                                                                                |
| Hooded Crow ( <i>Corvus corone cornix</i> )    | Europe    | 49 | 23, 35, 48, 73, 97, 128, 131, 139, 157, 160, 177, 178, 179, 185, 189, 205, 209, 207, 208, 210, 216, 229, 240, 242, 249, 250, 251, 252, 256, 261, 278, 292, 307, 325, 330, 332, 335, 336, 350, 357, 364, 365, 396, 397, 398, 399, 408, 418, 423                                                                                                                                                                                                                        |
| Rook ( <i>Corvus frugilegus</i> )              | Europe    | 62 | 18, 32, 43, 48, 60, 71, 85, 102, 120, 140, 141, 142, 143, 144, 145, 156, 162, 165, 166, 186, 189, 198, 210, 213, 216, 230, 240, 242, 249, 250, 251, 254, 275, 276, 278, 279, 281, 282, 283, 284, 290, 292, 294, 298, 308, 311, 325, 335, 336, 355, 363, 378, 395, 397, 398, 402, 410, 417, 418, 419, 420, 421                                                                                                                                                         |
| Rook ( <i>Corvus frugilegus</i> )              | Asia      | 1  | 238                                                                                                                                                                                                                                                                                                                                                                                                                                                                   |
| Rook ( <i>Corvus frugilegus</i> )              | America   | 1  | 66                                                                                                                                                                                                                                                                                                                                                                                                                                                                    |
| Western Jackdaw ( <i>Coloeus monedula</i> )    | Europe    | 50 | 11, 18, 22, 32, 33, 41, 47, 48, 60, 64, 69, 86, 102, 117, 135, 140, 144, 145, 160, 162, 177, 178, 189, 191, 216, 223, 226, 229, 240, 242, 249, 250, 251, 252, 260, 309, 310, 311, 325, 335, 336, 355, 359, 397, 398, 400, 403, 414, 420, 424                                                                                                                                                                                                                          |

|                                                    |           |    |                                                                                                                                                               |
|----------------------------------------------------|-----------|----|---------------------------------------------------------------------------------------------------------------------------------------------------------------|
| Western Jackdaw ( <i>Coloeus monedula</i> )        | America   | 2  | 66, 146                                                                                                                                                       |
| House Crow ( <i>Corvus splendens</i> )             | Asia      | 18 | 7, 16, 17, 54, 70, 106, 107, 158, 167, 182, 228, 253, 269, 289, 304, 346, 347, 348, 356, 377                                                                  |
| House Crow ( <i>Corvus splendens</i> )             | Africa    | 6  | 6, 15, 121, 259, 306, 327                                                                                                                                     |
| Jungle Crow ( <i>Corvus macrorhynchos</i> )        | Asia      | 24 | 17, 151, 152, 190, 204, 209, 217, 218, 248, 265, 286, 356, 370, 388, 389, 391, 404, 405, 406, 407, 411, 412, 413, 415                                         |
| Scrubjays ( <i>Aphelocoma</i> spp.)                | America   | 36 | 3, 4, 5, 25, 40, 42, 45, 46, 49, 50, 51, 52, 53, 59, 78, 83, 90, 93, 103, 123, 153, 199, 263, 264, 266, 267, 274, 291, 312, 316, 317, 318, 319, 320, 324, 360 |
| Blue Jay ( <i>Cyanocitta cristata</i> )            | America   | 11 | 28, 88, 116, 126, 221, 305, 174, 314, 331, 337, 338                                                                                                           |
| Choughs ( <i>Pyrrhocorax</i> spp.)                 | Europe    | 8  | 173, 175, 302, 303, 334, 358, 36, 285                                                                                                                         |
| Australian Raven ( <i>Corvus coronoides</i> )      | Australia | 5  | 224, 277, 293, 296, 313                                                                                                                                       |
| Little Raven ( <i>Corvus mellori</i> )             | Australia | 6  | 30, 34, 39, 293, 362, 375                                                                                                                                     |
| Fish Crow ( <i>Corvus ossifragus</i> )             | America   | 4  | 91, 154, 222, 258                                                                                                                                             |
| Fish Crow ( <i>Corvus ossifragus</i> )             | America   | 1  | 247                                                                                                                                                           |
| Steller's Jay ( <i>Cyanocitta stelleri</i> )       | America   | 4  | 262, 301, 361, 366                                                                                                                                            |
| Torresian Crow ( <i>Corvus orru</i> )              | Australia | 4  | 55, 72, 118, 119                                                                                                                                              |
| Korean Magpie ( <i>Pica pica sericea</i> )         | Asia      | 2  | 188, 196                                                                                                                                                      |
| Gray Jay ( <i>Perisoreus canadensis</i> )          | America   | 1  | 366                                                                                                                                                           |
| Black billed Magpie ( <i>Pica hudsonia</i> )       | America   | 1  | 262                                                                                                                                                           |
| Black billed Magpie ( <i>Pica hudsonia</i> )       | America   | 1  | 216                                                                                                                                                           |
| Chihuahuan Raven ( <i>Corvus cryptoleucus</i> )    | America   | 2  | 108, 109                                                                                                                                                      |
| Clark's Nutcracker ( <i>Nucifraga columbiana</i> ) | America   | 2  | 257, 366                                                                                                                                                      |
| Azure-winged Magpie ( <i>Cyanopica cyanus</i> )    | Europe    | 1  | 287                                                                                                                                                           |
| Beechey Jay ( <i>Cyanocorax beecheii</i> )         | America   | 1  | 379                                                                                                                                                           |
| Northwestern Crow ( <i>Corvus caurinus</i> )       | America   | 1  | 195                                                                                                                                                           |
| Yellow-billed Magpie ( <i>Pica nuttalli</i> )      | America   | 1  | 82                                                                                                                                                            |
| White-naped Jay ( <i>Cyanocorax cyanopogon</i> )   | America   | 1  | 21                                                                                                                                                            |
| White-necked Crow ( <i>Corvus leucognaphalus</i> ) | Africa    | 1  | 259                                                                                                                                                           |
| White-necked Raven ( <i>Corvus albicollis</i> )    | Africa    | 1  | 247                                                                                                                                                           |

---
